# Supplementary material for: Population Structure and Local Adaptation of MAC Lung Disease Agent Mycobacterium avium subsp. hominissuis
Source: PubMed Central journal article supplement — Genome Biol Evol. 2017 Sep 8;9(9):2403–17. doi: 10.1093/gbe/evx183 (PMC5622343; doi:10.1093/gbe/evx183), 2017-09-08
Supplement: evx183_suppfigs1.pdf [file evx183_suppfigs1.pdf]

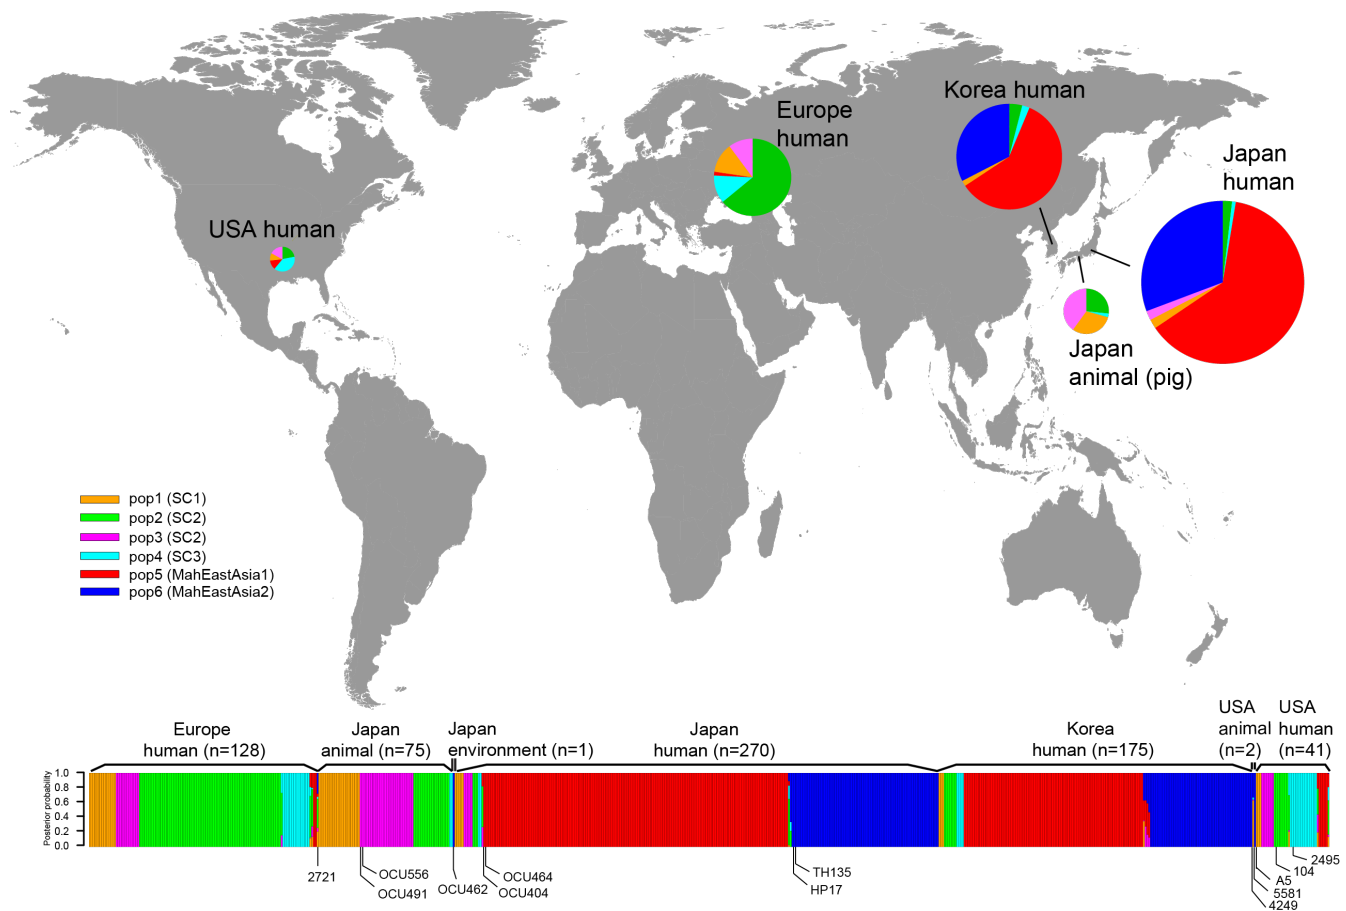

**Fig. S1. Worldwide distribution pattern of MAH population groups.**

Upper panel: Distribution of population groups inferred for 692 MAH global strains (based on 14-loci MLVA data). The BAPS mixture analysis result ( $k=6$ ) is shown. Brackets denote equivalent population groups as inferred by core genome SNP-based analysis for the sequenced strains. Pie chart diameters are proportional to sample size. Lower panel: Results of the admixture analysis.
