# Supplementary material for: Population Structure and Local Adaptation of MAC Lung Disease Agent Mycobacterium avium subsp. hominissuis
Source: PubMed Central journal article supplement — Genome Biol Evol. 2017 Sep 8;9(9):2403–17. doi: 10.1093/gbe/evx183 (PMC5622343; doi:10.1093/gbe/evx183), 2017-09-08
Supplement: evx183_suppfigs2.pdf [file evx183_suppfigs2.pdf]

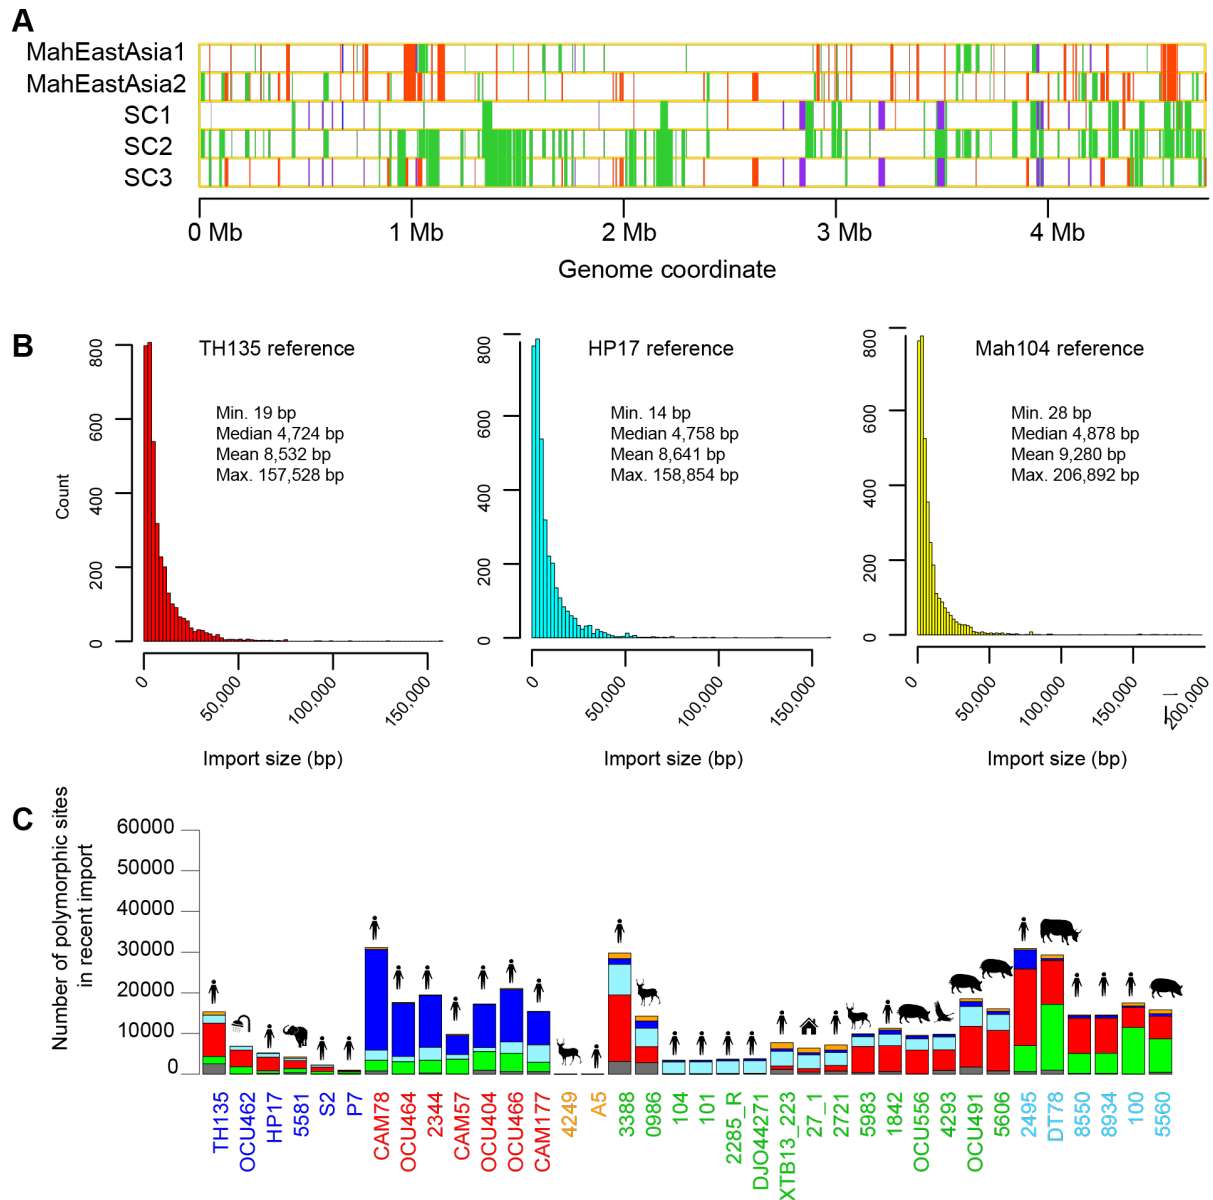

**Fig. S2. Summary of recombination analysis.**

(A) Visualization of ancestral recombination. Shared fragments were indicated by identical color. (B) Histograms showing distribution of the size of recently imported chromosome fragments. The analysis was performed using three different genome alignments. PSA denotes the proportion of the genomic fragment length, which exhibits shared ancestry. (C) Barplot showing the number of polymorphic sites included in recent genomic imports. The origin of genomic imports is indicated by color. The host or region of isolation is indicated by symbols on the bars.
